# Supplementary material for: The Use of Off-Label Medications in Newborn Infants Despite an Approved Alternative Being Available—Results of a National Survey
Source: MDPI journal article supplement (doi:10.3390/pharmacy10010019), 2022-01-25
Supplement: s1 [file s1]

## Supplemental Material: Survey Questionnaire (translated from German)

Dear esteemed colleagues!

In the context of a scientific project, we are conducting a nationwide survey in all Level 1 and Level 2 neonatal centers. We are interested to assess in what extend medications that are specifically approved for the neonatal population are used when a similar, off-label therapy that might be significantly cheaper is available.

Of course, your response and all data will be treated anonymously

Many thanks for your participation in this survey.

Please tick all that applies:

### 1. For the treatment of a PDA, you use

|                                         |                          |       |
|-----------------------------------------|--------------------------|-------|
| Ibuprofen (active ingredient Ibuprofen) | <input type="checkbox"/> | or:   |
| Pedea® (active ingredient Ibuprofen)    | <input type="checkbox"/> | or: ? |

Number of PDA- treatments in your center

(in average during the last 5 years):

|                                             |                                              |                                      |                                              |
|---------------------------------------------|----------------------------------------------|--------------------------------------|----------------------------------------------|
| approx. 1- 50/year <input type="checkbox"/> | approx. 50-100/year <input type="checkbox"/> | > 100/Jyear <input type="checkbox"/> | no treatment of PDA <input type="checkbox"/> |
|---------------------------------------------|----------------------------------------------|--------------------------------------|----------------------------------------------|

### 2. For the treatment of neonatal apnea, you use

|                                                      |                          |       |
|------------------------------------------------------|--------------------------|-------|
| Coffein – Citrat (active ingredient Coffein- Citrat) | <input type="checkbox"/> | or:   |
| Peyona® (active ingredient Coffein- Citrat)          | <input type="checkbox"/> | or: ? |

Number of neonatal apnea- treatments in your center

(in average during the last 5 years):

|                                             |                                              |                                      |                                                |
|---------------------------------------------|----------------------------------------------|--------------------------------------|------------------------------------------------|
| approx. 1- 50/year <input type="checkbox"/> | approx. 50-100/year <input type="checkbox"/> | > 100/Jyear <input type="checkbox"/> | no treatment of apnea <input type="checkbox"/> |
|---------------------------------------------|----------------------------------------------|--------------------------------------|------------------------------------------------|

### 3. For the treatment of infantile hemangiomas, you use

|                                             |                          |       |
|---------------------------------------------|--------------------------|-------|
| Propranolol (active ingredient Propranolol) | <input type="checkbox"/> | or    |
| Hemangiol® (active ingredient Propranolol)  | <input type="checkbox"/> | or: ? |

Number of infantile hemangioma treatments in your center

(in average during the last 5 years):

|                                             |                                              |                                      |                                                     |
|---------------------------------------------|----------------------------------------------|--------------------------------------|-----------------------------------------------------|
| approx. 1- 50/year <input type="checkbox"/> | approx. 50-100/year <input type="checkbox"/> | > 100/Jyear <input type="checkbox"/> | no treatment of hemangioma <input type="checkbox"/> |
|---------------------------------------------|----------------------------------------------|--------------------------------------|-----------------------------------------------------|
